# Supplementary material for: The Discrete Moment Problem with Nonconvex Shape Constraints
Source: Atypon-hosted journal article supplement (doi:10.1287/opre.2020.1990), 2020-10-26
Supplement: opre.2020.1990.sm1.pdf [file opre.2020.1990.sm1.pdf]

## Proofs

### EC.1. Proof of **Proposition 1**

Setting  $u = v = 1$  in (3c) specializes to (2c). Further, (3c) guarantees consecutive support: if there exist  $j_1 < j_2 < j_3$  such that  $x_{j_1}, x_{j_3} > 0$ ,  $x_{j_2} = 0$ , by setting  $u = j_2 - j_1, v = j_3 - j_2$ , the constraint  $x_{j-u}^v x_{j+v}^u \leq x_j^{u+v}$  for  $j = j_2$  is violated. Hence, every feasible distribution of (DMP-LC') is a feasible distribution of (DMP-LC) with the same objective value (note the objectives of both problems are identical).

On the other hand, any feasible distribution to problem (2) with support  $[k, \ell]$  satisfies (3c), and by a straightforward induction starting with (2c) as a base case. To be specific, we assume that for some  $u$  and  $v$ ,  $x_{j-u}^v x_{j+v}^u \leq x_j^{u+v}$  holds for  $j \in (k, \ell), j - u \geq k, j + v \leq \ell$ , and we want to show that  $x_{j-u}^{v+1} x_{j+v+1}^u \leq x_j^{u+v+1}$ . Then it suffices to establish

$$x_{j-u} x_{j+v+1}^u \leq x_{j+v}^u x_j, \quad (\text{EC.1})$$

From (2c), we have that  $x_{j+v}^2 \geq x_{j+v-1} x_{j+v+1}$ ,  $x_{j+v-1}^2 \geq x_{j+v-2} x_{j+v}$ ,  $\dots$ ,  $x_{j-k}^2 \geq x_{j-k+1} x_{j-k-1}$ . Putting those equalities together by applying multiplications to and canceling out the same terms on both sides give that

$$x_{j+v} x_{j-k} \geq x_{j+v+1} x_{j-k-1}, \quad 0 \leq k \leq j - 2. \quad (\text{EC.2})$$

Hence, starting from  $x_{j+v} x_j \geq x_{j+v+1} x_{j-1}$ , multiplying it by (EC.2) with  $1 \leq k \leq u - 1$ , and (EC.1) follows as required by canceling out the same terms on both sides.

For those points  $j$  such that  $j - u$  or  $j + v$  is outside the support, or the middle point  $j$  outside the support, the constraint  $x_{j-u}^v x_{j+v}^u \leq x_j^{u+v}$  holds naturally because the left-hand side is zero for these cases. In other words, (3c) is satisfied. Hence, every feasible distribution of (DMP-LC) is a feasible distribution of (DMP-LC') with the same objective value.  $\square$

## EC.2. Proof of Proposition 2

We first prove a preliminary lemma for establishing [Proposition 2](#).

LEMMA EC.1. *The set  $\{(x, y, z) : x^u y^v \geq z^{u+v}, x \geq 0, y \geq 0, z \geq 0\}$  is convex for any positive integers  $u$  and  $v$ . Moreover, the set  $\{(x, y, z) : x^u y^v \geq (z + \epsilon)^{u+v}, x \geq 0, y \geq 0, z \geq 0\}$  is also convex for any positive integers  $u$  and  $v$  and nonnegative real  $\epsilon$ .*

*Proof of Lemma EC.1.* For any integers  $u$  and  $v$ , let  $t$  be an integer such that  $u + v \leq 2^t$ . From point 11 on page 95 of [Ben-Tal and Nemirovski \(2001\)](#), the set  $\{(x_1, \dots, x_{2^t}, z) : x_j \geq 0, 1 \leq j \leq 2^t, z \leq (\prod_{j=1}^{2^t} x_j)^{1/2^t}\}$  is conic-quadratic representable, and thus convex. Therefore, when intersecting with linear constraints, the set

$$\begin{aligned} \{(x_1, \dots, x_{2^t}, z) : x_j \geq 0, 1 \leq j \leq 2^t, 0 \leq z \leq (\prod_{j=1}^{2^t} x_j)^{1/2^t}, x_j = x_k \text{ for } j, k \in [1, u] \\ x_j = x_k \text{ for } j, k \in [u+1, u+v], \text{ and } x_j = z \text{ for } j, k \in [u+v+1, 2^t]\} \end{aligned} \quad (\text{EC.3})$$

is also convex. Now, consider the image of this set under the coordinate projection onto  $x_1$  (reabeled as  $x$ ),  $x_{u+1}$  (reabeled as  $y$ ), and  $z$ . The set in [\(EC.3\)](#) becomes

$$S := \{(x, y, z) : z \leq (x^u y^v z^{2^t - u - v})^{1/2^t}, x \geq 0, y \geq 0, z \geq 0\},$$

which is convex because the projection of a convex set is convex. Observe that the constraint  $z \leq (x^u y^v z^{2^t - u - v})^{1/2^t}$  is equivalent to  $z^{u+v} \leq x^u y^v$  and so the set  $S$  is precisely the set in the statement of the lemma. The fact  $S$  is a convex set proves the result.

To show the “moreover”, simply define  $w = z + \epsilon$  and the set in question can be written  $T = \{(x, y, w) : x^u y^v \geq w^{u+v}, x \geq 0, y \geq 0, w \geq \epsilon\}$ . Note that this set is the intersection of  $\{(x, y, w) : x^u y^v \geq w^{u+v}, x \geq 0, y \geq 0, w \geq 0\}$  (convex by the previous part of the lemma) and the convex set  $\{(x, y, w) : w \geq \epsilon\}$ . Thus,  $T$  is convex because the intersection of convex sets is convex.  $\square$

*Proof of Proposition 2.* First, define the set

$$S(\epsilon) \triangleq \{(x, y, z) : x^u y^v \geq (z + \epsilon)^{u+v}, x \geq 0, y \geq 0, z \geq 0\}.$$

By [Lemma EC.1](#),  $S(\epsilon)$  is convex for every  $\epsilon > 0$  and the sets are nested; that is,  $S(\epsilon_1) \subseteq S(\epsilon_2)$  for  $\epsilon_1 \geq \epsilon_2$ , which implies the union  $\bigcup_{\epsilon > 0} S(\epsilon)$  is also a convex set (the union of convex nested sets is convex).

Next, we make the following claim:

$$S \triangleq \{(x, y, z) : x^u y^v > z^{u+v}, x \geq 0, y \geq 0, z \geq 0\} = \bigcup_{\epsilon > 0} S(\epsilon). \quad (\text{EC.4})$$

This claim suffices to prove the result because  $\bigcup_{\epsilon > 0} S(\epsilon)$  is convex.

The  $\supseteq$  containment in (EC.4) holds because  $S(\epsilon) \subseteq S$  for all  $\epsilon > 0$ . Conversely, to show  $\subseteq$  in (EC.4), let  $(x, y, z) \in S$ . Hence, we must have  $x^u y^v - z^{u+v} = \delta > 0$ . Next, we show there exists an  $\epsilon > 0$  such that  $x^u y^v = (z + \epsilon)^{u+v}$ , in which case,  $(x, y, z) \in S(\epsilon)$  and we are done. Taking  $\epsilon = (z^{u+v} + \delta)^{\frac{1}{u+v}} - z$  does the trick.  $\square$

### EC.3. Proof of Lemma 1

According to Definition 2, we have the following inequality if  $x$  is an IFR distribution:

$$\frac{x_j}{\sum_{k=j}^n x_k} - \frac{x_{j+1}}{\sum_{k=j+1}^n x_k} \leq 0, \text{ for } j \in [1, n-1],$$

which is equivalent to

$$x_j \sum_{k=j+1}^n x_k - x_{j+1} \sum_{k=j}^n x_k \leq 0, \text{ for } j \in [1, n-1], \quad (\text{EC.5})$$

whereas if  $\{\bar{F}_1, \dots, \bar{F}_n\}$  is log-concave, we have

$$\sum_{k=j-1}^n x_k \sum_{k=j+1}^n x_k - \left( \sum_{k=j}^n x_k \right)^2 \leq 0, \text{ for } j \in [2, n-1],$$

which is equivalent to

$$x_j \sum_{k=j+1}^n x_k - x_{j+1} \sum_{k=j}^n x_k \leq 0, \text{ for } j \in [1, n-2]. \quad (\text{EC.6})$$

Inequalities (EC.5) and (EC.6) are the same except that (EC.6) does not include the case in which  $j = n-1$ . In this case, the inequality holds naturally:  $x_{n-1}x_n - x_n(x_{n-1} + x_n) \leq 0$ . Thus, the two definitions of IFR distribution are equivalent.  $\square$

## EC.4. Proof of Proposition 3

First, define the set

$$S(\epsilon) \triangleq \left\{ (x, y, z) : \left\| \begin{pmatrix} ax \\ by + cz \end{pmatrix} \right\| \leq ax + cz - \epsilon \right\}.$$

Obviously,  $S(\epsilon)$  is a standard SOC and thus convex for every  $\epsilon > 0$ . Moreover, the sets are nested as  $S(\epsilon_1) \subseteq S(\epsilon_2)$  for  $\epsilon_1 \geq \epsilon_2$ , which implies that the union  $\bigcup_{\epsilon > 0} S(\epsilon)$  is also a convex set, because the union of convex nested sets is convex. Next, we make the following claim:

$$S \triangleq \left\{ (x, y, z) : \left\| \begin{pmatrix} ax \\ by + cz \end{pmatrix} \right\| < ax + cz \right\} = \bigcup_{\epsilon > 0} S(\epsilon). \quad (\text{EC.7})$$

This claim suffices to prove the result because  $\bigcup_{\epsilon > 0} S(\epsilon)$  is convex. The  $\supseteq$  containment in (EC.7) holds since  $S(\epsilon) \subseteq S$  for all  $\epsilon > 0$ . Conversely, to show  $\subseteq$  in (EC.7), let  $(x, y, z) \in S$ . Hence, we must have

$$ax + cz - \left\| \begin{pmatrix} ax \\ by + cz \end{pmatrix} \right\| = \delta > 0.$$

Taking  $\epsilon = \delta$ , we have  $(x, y, z) \in S(\epsilon)$ .  $\square$

## EC.5. Proof of Theorem 1 and Lemma 4

*Proof of Lemma 4.* The fact that  $\text{ext } \overline{\text{conv}} S \subseteq S$  follows immediately from Klee (1957, Theorem 3.5). Suppose, by way of contradiction, that there exists an  $x \in \text{ext } \overline{\text{conv}} S$  that is not an extreme point of  $S$ . Then, there exist  $y, z \in S$  with  $y \neq z$  such that  $x = \lambda y + (1 - \lambda)z$  where  $\lambda > 0$ . However, since  $y, z \in \overline{\text{conv}} S$ , this contradicts that  $x \in \text{ext } \overline{\text{conv}} S$ . The result then holds.  $\square$

With Lemma 2, Lemma 3, and Lemma 4 in hand, we can now establish Theorem 1.

*Proof of Theorem 1.* The problem  $\min \{c(x) : x \in \overline{\text{conv}} S\}$  has an optimal extreme point solution  $x^* \in \text{ext } \overline{\text{conv}} S$  by Lemma 2 and the fact that  $\overline{\text{conv}} S$  is a compact convex set by Lemma 3. Since  $S \subseteq \overline{\text{conv}} S$ ,  $\min \{c(x) : x \in \overline{\text{conv}} S\} \leq \min \{c(x) : x \in S\}$ . However, since  $x^* \in S$ , by Lemma 4, we have  $c(x^*) = \min \{c(x) : x \in \overline{\text{conv}} S\} \leq \min \{c(x) : x \in S\} \leq c(x^*)$  since  $x^*$  is optimal to the minimization over  $\overline{\text{conv}} S$  and feasible to the minimization over  $S$ . However, all inequalities must therefore be equalities and so  $\min \{c(x) : x \in S\} = c(x^*)$ . Since  $x^* \in \text{ext } S$  by Lemma 4, (8) must have an optimal extreme-point solution.  $\square$

## EC.6. Proof of Lemma 5

Since  $c$  is lower-semicontinuous and quasiconcave and  $F$  is compact, [Theorem 1](#) implies that there exists an optimal extreme point solution  $x^*$ . Let  $F^*$  denote the connected component of  $F$  that contains  $x^*$  and restrict attention to those  $R_p$  that intersect  $F^*$ . Let  $C_p = \mathbb{R}^n \setminus R_p$ . Then,  $C_p$  is an open convex set since  $R_p$  is closed and reverse convex. Since  $x^* \in F$ ,  $x^* \notin C_p$  for all  $p$ . For all  $p$ , let  $y_p$  be such that  $\text{dist}(x^*, \text{cl}(C_p)) = \text{dist}(x^*, y_p)$ ; that is,  $y_p$  minimizes the distance between  $x^*$  and the closure of  $C_p$ .

Since  $x^*$  is an extreme point of  $F$ , there exists a  $p$  such that  $x^* \in \text{bd}(R_p)$ . By definition,  $\text{bd}(C_p) = \text{bd}(R_p)$  and so there exists a  $p$  such that  $x^* \in \text{bd}(C_p)$ . Clearly, if  $x^* \in \text{bd}(C_p)$  then  $\text{dist}(x^*, \text{cl}(C_p)) = 0$  and so  $y_p = x^*$ . Hence, there always exists a  $p$  such that  $y_p = x^* \in \text{bd}(C_p)$ .

Using the vector  $y_p$ , we can define for all  $p \in [1, P]$  a supporting hyperplane of  $\text{cl}(C_p)$  with normal  $\alpha_p$  and right-hand side  $\beta_p$  that weakly separates  $C_p$  from the point  $x^*$ . These hyperplanes define the polyhedron  $\hat{F} = \{x : \alpha_p^\top x \geq \beta_p, \text{ for } p \in [1, P]\}$  so that  $\alpha_p^\top x^* \geq \beta_p$  for all  $p$ . Such a choice is always possible since each hyperplane weakly separates  $C_p$  from the point  $x^*$ , which implies  $x^* \in \hat{F}$ . In the special case in which  $y_p \neq x^*$ , the hyperplane  $\{x : (x^* - y_p)^\top (x - y_p) \leq 0\}$  does the trick, by the standard projection theorem. Next, we claim  $\hat{F} \subseteq F^*$ . Indeed, since  $\alpha_p^\top x \leq \beta_p$  is a supporting hyperplane of  $\text{cl}(C_p)$ , the set of  $x$  that satisfies  $\alpha_p^\top x \geq \beta_p$  lies on the boundary of  $C_p$  or outside of  $C_p$ . Such an  $x$  lies entirely inside of  $R_p$ , which implies  $\hat{F}$  is a subset of  $R_p$  for all  $p$ , and so  $\hat{F} \subseteq F^*$ .

Consider the optimization problem

$$\begin{aligned} \min c(x) \\ \text{s.t. } \alpha_p^\top x \geq \beta_p \text{ for } p \in [1, P]. \end{aligned} \tag{EC.8}$$

Since  $x^* \in \hat{F} \subseteq F^*$  and  $x^*$  is an optimal solution of the original problem,  $x^*$  is an optimal solution of [\(EC.8\)](#). Moreover,  $x^*$  is an extreme point of  $\hat{F}$  and so at least  $n$  linearly independent constraints at  $x^*$  are tight, by the characterization of extreme points of polyhedra ([Bertsimas and Tsitsiklis 1997](#), Theorem 2.3). Hence, at least  $n$  of the inequalities  $\alpha_p^\top x \geq \beta_p$  must be tight at  $x = x^*$ . The points in  $\hat{F}$  that satisfy  $\alpha_p^\top x = \beta_p$  are boundary points of  $C_p$  since  $\alpha_p^\top x = \beta_p$  is a supporting hyperplane of the convex set  $C_p$ . Since  $\text{bd}(R_p) = \text{bd}(C_p)$ ,

the points in  $\hat{F}$  that satisfy  $\alpha_p^\top x = \beta_p$  are boundary points of  $R_p$ . Hence,  $x^*$  lies on the boundary of at least  $n$  of the sets  $R_p$ .  $\square$

## EC.7. Proof of Theorem 2

This proof uses the following notation. For any feasible solution  $x$  to (Rev-Cvx), let  $S(x)$  denote the support of  $x$ ; that is,  $S(x) = \{j : x_j > 0\}$ . Let  $A^i$  denote the  $i$ -th row of the matrix  $A$  and  $A_j$  the  $j$ -th column. For any subset  $S$  of  $[1, n]$  (e.g., the support of a feasible solution), let  $A_S = [A_j]_{j \in S}$ . That is,  $A_S$  is the submatrix of  $A$  consisting of the columns indexed by  $S$ . Note  $A_S^r$  denotes the  $r$ -th row of the matrix  $A_S$  and let  $\mathcal{L}(S) = \text{span}(\{(A_S^1)^\top, \dots, (A_S^m)^\top\})$  denote the span of the rows of  $A_S$ . Finally, let  $\nabla f_p(x)$  denote the gradient of  $f_p$  at  $x$ , where  $[\nabla f_p(x)]_S$  is the gradient of  $f_p$  restricted to the components in the subset  $S$ .

Now, for the proof. Since  $c$  is continuous and quasiconcave and  $F$  is a compact set, by Theorem 1 there exists an optimal extreme point solution. For any such optimal extreme point  $x^*$  with support  $S = S(x^*)$ , define

$$F_0 := \{x : Ax = b, x_j = 0 \text{ for } j \notin S, x_j > 0 \text{ for } j \in S\}.$$

Then, the feasible region  $F$  includes  $\{x : f_p(x) \leq 0, p = 1, \dots, P\} \cap X_0$ . Let  $\delta_1 = \min\{x_j^* : x_j^* > 0\}$  and denote

$$F(\delta_1) := \{x : Ax = b, x_j = 0 \text{ for } j \notin S, x_j \geq \delta_1/2, \text{ for } j \in S\}.$$

Our goal is as follows. For  $p = 1, \dots, P$ , we want to construct sets  $\hat{F}_p$  of the form

$$\hat{F}_p := \{x : \alpha_p^\top (x - x^*) \leq \beta_p\} \cap F(\delta_1), \quad (\text{EC.9})$$

such that

$$\hat{F} := \bigcap_{p=1}^P \hat{F}_p = \{x : \alpha_p^\top (x - x^*) \leq \beta_p, p = 1, \dots, P\} \cap F(\delta_1) \quad (\text{EC.10})$$

is a subset of  $F$ , where  $\alpha_p$  and  $\beta_p \geq 0$  will be specified later. Since  $\beta_p \geq 0$ ,  $x^* \in \hat{F}_p$  for all  $p$ , and is thus in  $\hat{F}$ . So, as long as  $\hat{F} \subseteq F$  since  $x^*$  is an extreme point of  $F$ , it must also be an extreme point of  $\hat{F}$ . Note  $\hat{F}$  is defined by linear equalities and inequalities and so there must exist  $n$  of them that are tight at point  $x^*$ , and we can further check which constraints are tight.

|                                                                   |                                                                                                                          |
|-------------------------------------------------------------------|--------------------------------------------------------------------------------------------------------------------------|
| $0 \notin \text{cl}(Y_p)$                                         | $\alpha_p = \hat{\alpha}_p, \beta_p = \hat{\beta}_p/2, \hat{\alpha}_p$ and $\hat{\beta}_p$ obtained by strong separation |
| $0 \in \text{cl}(Y_p)$                                            | $\alpha_p = \hat{\alpha}_p, \beta_p = 0, \hat{\alpha}_p$ are obtained weak separation                                    |
| $0 \in \text{cl}(Y_p), [\nabla f_p(x^*)]_S \notin \mathcal{L}(S)$ | $\alpha_p = \nabla f_p(x^*)$ and $\beta_p = 0$                                                                           |

**Table EC.1** Specifying  $\alpha_p$  and  $\beta_p$  in  $\hat{X}_p$ .

We now construct the  $\hat{F}$  in (EC.10). Let  $x_S = [x_j]_{j \in S}$  and

$$F_p = F_0 \cap \{(x_S; 0) : f_p(x_S; 0) > 0\}. \quad (\text{EC.11})$$

Here,  $(x_S; 0)$  denotes a vector with value 0 outside of the index set  $S$ . A key property of  $F_p$  is that it admits a strong separation property useful for our arguments (see [Claim EC.1](#) below). To describe this property, we explore a related set in a smaller subspace. Construct matrix  $B \in \mathbb{R}^{|S| \times (|S| - \text{rank}(A_S))}$  such that its columns span the whole null space of  $A_S$ . That is,  $A_S B = 0$  and  $\text{rank}(B) = |S| - \text{rank}(A_S)$ . Then, we have that

$$\{(x_S; 0) : A_S x_S = b\} = \{(By + x_S^*; 0) : y \in \mathbb{R}^{(|S| - \text{rank}(A_S))}\}. \quad (\text{EC.12})$$

Letting

$$Y_p := \{y : By + x_S^* > 0, f_p(By + x_S^*; 0) > 0\},$$

we can define the “strong separation” property of  $F_p$  as follows:

**CLAIM EC.1.** (*Strong separation*) For all  $p$ , there exist  $\alpha_p^\top$  and  $\hat{\beta}_p > 0$  such that

$$\begin{cases} \hat{\alpha}_p^\top(x - x^*) \geq \hat{\beta}_p > 0, & \text{for } x \in F_p \text{ if } 0 \notin \text{cl}(Y_p) \\ \hat{\alpha}_p^\top(x - x^*) > 0, & \text{for } x \in F_p \text{ if } 0 \in \text{cl}(Y_p). \end{cases} \quad (\text{EC.13})$$

Moreover, if we further assume  $[\nabla f_p(x^*)]_S \notin \mathcal{L}(S)$  then  $\nabla f(x^*)^\top(x - x^*) > 0$  for all  $x \in F_p$ .

The proof of this claim is somewhat technical and so is relegated to the end of this section.

We take it as given and return to constructing  $\hat{F}$ . According to (EC.10), it suffices to show how to construct  $\hat{F}_p$  such that

$$\hat{F}_p \subseteq \{x : f_p(x) \leq 0\}, \quad p \in [1, P], \quad (\text{EC.14})$$

since  $F(\delta_1) \subseteq F_0$ . In other words, we need to prove that  $x \in \hat{F}_p$  implies  $f_p(x) \leq 0$ .

We show (EC.14) in two cases: (i)  $0 \notin \text{cl}(Y_p)$  and (ii)  $0 \in \text{cl}(Y_p)$ . We use [Table EC.1](#) to track some of the notation and details.

In case (i), according to **Claim EC.1**, there exist a  $\hat{\alpha}_p \neq 0$  and  $\hat{\beta}_p \neq 0$  such that

$$\hat{\alpha}_p^\top(x - x^*) \geq \hat{\beta}_p > 0 \text{ for all } x \in F_p. \quad (\text{EC.15})$$

By letting  $\alpha_p = \hat{\alpha}_p$  and  $\beta_p = \frac{\hat{\beta}_p}{2}$ , one has  $x^* \in \hat{F}_p \neq \emptyset$ . Moreover, from definition (EC.9) of  $\hat{F}_p$ , any  $x \in \hat{F}_p$  satisfies  $x \in F(\delta_1) \subseteq F_0$  and

$$\hat{\alpha}_p^\top(x - x^*) = \alpha_p^\top(x - x^*) \leq \beta_p = \hat{\beta}_p/2.$$

Combining this statement with (EC.15) yields that  $x \notin F_p$  for any  $x \in \hat{F}_p$ . Then, according to (EC.11), such  $x$  does not belong to  $F_p$ , simply because it violates the constraint  $f_p(x) > 0$ . Therefore, we can conclude  $f_p(x) \leq 0$  for all  $x \in \hat{F}_p$ .

In case (ii), again by **Claim EC.1**, we have  $\hat{\alpha}^\top(x - x^*) > 0$  for  $x \in F_p$ , where  $\hat{\alpha} = \nabla f(x^*)$  if  $[\nabla f_p(x^*)]_S \notin \mathcal{L}(S)$ . Then, we can take  $\alpha_p = \nabla f_p(x^*)$  and  $\beta_p = 0$  in (EC.9). Obviously,  $x^* \in \hat{F}_p \neq \emptyset$  and  $x \notin \hat{F}_p$  for any  $x \in F_p$ . Similarly, we can argue such an  $x$  does not belong to  $\hat{F}_p$  due to the violation of the constraint  $f_p(x) > 0$ . Then, it follows that  $f_p(x) \leq 0$  for all  $x \in \hat{F}_p$ .

So far, we have constructed  $\hat{F}_p$  in the form of (EC.11) (as in **Table EC.1**) and  $\hat{F}$  based on (EC.10). Moreover, we have shown  $\hat{F} \subseteq F$ . Since  $x^*$  is an extreme point of  $F$  and lies both in  $F$  and  $\hat{F}$ , it is an extreme point of  $\hat{F}$  as well. Note  $\hat{F}$  is defined by a number of linear equalities and inequalities, then there must exist  $n$  of them that are tight and linear independent at point  $x^*$  by standard theory (see e.g. **Bertsimas and Tsitsiklis (1997, Theorem 2.3)**).

Since  $A$  is an  $m$  by  $n$  matrix of rank  $m$ , there are  $n - m$  tight constraints from

$$\begin{aligned} \alpha_p^\top(x - x^*) &\leq \beta_p && \text{for } p \text{ such that } 0 \notin \text{cl}(Y_p) \\ \alpha_p^\top(x - x^*) &\leq 0 && \text{for } p \text{ such that } 0 \in \text{cl}(Y_p) \\ x_j &= 0 && \text{for } j \notin S \\ x_j &\geq \delta_1/2 && \text{for } j \in S, \end{aligned}$$

where  $\alpha_p = \nabla f_p(x^*)$  if  $[\nabla f_p(x^*)]_S \notin \mathcal{L}(S)$ . Now, we investigate which of the above constraints are tight. First, obviously  $x_j^* = 0$  is tight for all  $j \notin S$ , and  $x_j^* \geq \delta_1 > \delta_1/2$  can not be tight for all  $j \in S$ . Then, for the constraint  $p$  such that  $0 \notin \text{cl}(Y_p)$  since  $\beta_p > 0$ ,  $\alpha_p^\top(x^* - x^*) = 0 < \beta_p$  cannot be tight. Finally, recall we have proved in the previous discussion that  $f_p(x^*) \geq 0$  for all  $p$  such that  $0 \in \text{cl}(Y_p)$ . That is, when  $f_p(x^*) < 0$ , it holds that

$0 \notin \text{cl}(Y_p)$ , and thus the corresponding constraint  $\alpha_p^\top(x - x^*) \leq \beta_p$  cannot be tight at  $x^*$ . In summary, all  $n - m$  tight constraints come from

$$\begin{aligned} \alpha_p^\top(x - x^*) \leq 0 \text{ for } p \text{ such that } f_p(x^*) = 0 \text{ and } 0 \in \text{cl}(Y_p) \\ x_j = 0 \text{ for } j \notin S, \end{aligned} \quad (\text{EC.16})$$

which implies  $n - m$  of the inequalities

$$\begin{aligned} f_p(x^*) \leq 0 \text{ for } p \in [1, P] \\ x_j^* \geq 0 \text{ for } j \in [1, n] \end{aligned}$$

in **(Rev-Cvx)** are tight. This completes the proof of **Theorem 2**.  $\square$

The proof of **Claim EC.1** relies on the following two subclaims.

**Subclaim 1** *The set  $Y_p$  is a convex and open set for  $p = 1, \dots, P$ .*

*Proof of Subclaim 1:* By assumption,  $S_1 := \{x : f_p(x) > 0, x \geq 0\}$  is convex. Therefore,  $S_2 := \{x : f_p(x) > 0, x \geq 0\} \cap \{x : Ax = b\}$  is also a convex set since we are intersecting  $S_1$  with the convex set  $\{x : Ax = b\}$ . Moreover, the set  $S_3 := S_2 \cap \{x : x_S > 0, x_{\bar{S}} = 0\}$  is again convex since  $\{x : x_S > 0, x_{\bar{S}} = 0\}$  is a convex set. Finally, consider the affine map  $y \mapsto (By + x_S^*, 0)$ . Note that  $Y_p$  is the inverse image of this map and therefore convex.

Moreover, for any  $y_1 \in Y_p$ , let

$$0 < \delta = \min_{j \in \{1, \dots, |S|\}} \{(By_1 + x_S^*)_j : f_p(By_1 + x_S^*; 0) > 0\}.$$

Since  $f_p(\cdot)$  is continuous, there exists an  $\epsilon > 0$  such that for any  $y$  with  $\|y - y_1\|_2 \leq \epsilon$ , we have

$$\min_{j \in \{1, \dots, |S|\}} \{(By + x_S^*)_j : f_p(By + x_S^*; 0) > 0\} \geq \delta/2 > 0.$$

Thus,  $y \in Y_p$  and  $Y_p$  is open. This completes the proof of **Subclaim 1**.  $\square$

Moreover, we have a “strong separation property” of  $Y_p$  described as follows.

**Subclaim 2** *There exist a  $d_p \neq 0$  and  $\hat{\beta}_p > 0$  such that*

$$\begin{cases} d_p^\top y \geq \hat{\beta}_p > 0, \text{ for } y \in Y_p \text{ if } 0 \notin \text{cl}(Y_p) \\ d_p^\top y > 0, \text{ for } y \in Y_p \text{ if } 0 \in \text{cl}(Y_p). \end{cases} \quad (\text{EC.17})$$

Moreover, letting  $g_p(y) = f_p(By + x_S^*; 0)$  and assuming  $\nabla g_p(0) \neq 0$ , if  $0 \in \text{cl}(Y_p)$  then  $\nabla g_p(0)^\top y > 0$  for all  $y \in Y_p$ .

*Proof of Subclaim 2:* Note that  $f_p(B \cdot 0 + x_S^*; 0) = f_p(x_S^*; 0) = f_p(x^*) \leq 0$ , thus  $0 \notin Y_p$ . Since, by **Subclaim 1**,  $Y_p$  is convex,  $\text{cl}(Y_p)$  is both closed and convex. Then if  $0 \notin \text{cl}(Y_p)$ , by the strong separation theorem for closed convex sets (see, for instance, **Aliprantis and Border (2006, Corollary 5.80)**), there exist  $d_p \neq 0$  and  $\hat{\beta}_p > 0$  such that  $d_p^\top y \geq \hat{\beta}_p > 0$  for  $y \in Y_p$ . In the case of  $0 \in \text{cl}(Y_p)$ , weak separation holds. That is, there exists an  $\hat{\alpha}_p \neq 0$  such that

$$\hat{\alpha}_p^\top y \geq 0^\top y = 0 \text{ for all } y \in Y_p. \quad (\text{EC.18})$$

Since  $Y_p$  is open, that weak separation becomes strict; that is,  $\hat{\alpha}_p^\top y > 0$  for all  $y$ . Otherwise, if there exists a  $y' \in Y_p$  such that  $\hat{\alpha}_p^\top y' = 0$  then since  $Y_p$  is open there exists a  $y'' \in Y_p$  in a small neighborhood of  $y'$  such that  $\hat{\alpha}_p^\top y'' < 0$ . This violates the condition shown above that  $\hat{\alpha}_p^\top y \geq 0$  for  $y \in Y_p$ . Together this yields **(EC.17)**.

To establish the “moreover” part, note  $g_p(y) = f_p(By + x_S^*; 0) \geq 0$  for any  $y \in \text{cl}(Y_p)$ . Hence,  $g_p(0) = f_p(x_S^*; 0) = f_p(x^*) \leq 0$ . Combining these two facts gives that  $g_p(0) = 0$  when  $0 \in \text{cl}(Y_p)$ . That is, 0 is a global minimizer of the problem

$$\begin{aligned} & \min g_p(y) \\ & \text{s.t. } y \in \text{cl}(Y_p). \end{aligned}$$

Thus, the following optimality condition in the form of variational inequality holds:  $\nabla g_p(0)^\top (y - 0) \geq 0$  for  $y \in \text{cl}(Y_p)$ , which trivially leads to  $\nabla g_p(0)^\top y \geq 0$  for  $y \in Y_p$ . Since  $Y_p$  is open, we get strict separation  $\nabla g_p(0)^\top y > 0$  for all  $y \in Y_p$ . This completes the proof of **Subclaim 2**.  $\square$

*Proof of Claim EC.1:* We show **(EC.13)** holds with  $\hat{\alpha}_p = (B(B^\top B)^{-1}d_p; \gamma_p)$ , with  $d_p$  being defined in **Subclaim 2** and any  $\gamma_p \in \mathbb{R}^{n-|S|}$  and  $\hat{\beta}_p$  as constructed in **Subclaim 2**. Indeed, for any  $x \in F_p$ , due to **(EC.12)**, we can find a  $y \in Y_p$  such that  $x = (By + x_S^*; 0) = (By; 0) + x^*$ . Consequently,

$$\hat{\alpha}_p^\top (x - x^*) = d_p^\top (B^\top B)^{-\top} B^\top By + \gamma_p^\top 0 = d_p^\top y.$$

Then, according to **Subclaim 2**, **(EC.13)** holds.

To establish the “moreover” of **Claim EC.1**, observe that when  $\nabla g_p(0) \neq 0$  and  $0 \in \text{cl}(Y_p)$ , by letting  $\hat{\alpha}_p = (B(B^\top B)^{-1}\nabla g_p(0); \gamma_p)$  with any  $\gamma_p \in \mathbb{R}^{n-|S|}$ , we have  $\hat{\alpha}_p^\top (x - x^*) > 0$  for  $x \in F_p$ . The argument here is analogous to what we used when establishing **(EC.13)**.

Now, suppose  $[\nabla f_p(x^*)]_S \notin \mathcal{L}(S)$  and  $0 \in \text{cl}(Y_p)$ . We argue that

$$\nabla f(x^*)^\top (x - x^*) > 0, \text{ for } x \in F_p. \quad (\text{EC.19})$$

First, a direct computation yields

$$\nabla g_p(0) = [B^\top 0] \nabla f_p(B y + x_S^*; 0) \Big|_{y=0} = [B^\top 0] \nabla f_p(x_S^*; 0) = [B^\top 0] \nabla f_p(x^*) = B^\top [\nabla f_p(x^*)]_S. \quad (\text{EC.20})$$

Since  $[\nabla f_p(x^*)]_S \notin \mathcal{L}(S)$ , we have  $\nabla g_p(0) \neq 0$ . Otherwise, due to (EC.20),  $[\nabla f_p(x^*)]_S$  belongs to the null space of  $B^\top$ , which is exactly  $\mathcal{L}(S)$ , giving rise to a contradiction.

For any  $x \in F_p$ ,  $A_S(x_S - x_S^*) = A_S x_S - A_S x_S^* = 0$ , thus  $x_S - x_S^* \in \text{Null}(A_S)$ . Moreover, recall that the columns of  $B$  span the whole  $\text{Null}(A_S)$ ; then there exists a  $\theta \neq 0$  such that  $x_S - x_S^* = B\theta$ . Now, let  $\hat{\alpha}_p = (B(B^\top B)^{-1} B^\top \nabla f_p(x_S^*; \gamma_p))$  with any  $\gamma_p \in \mathbb{R}^{n-|S|}$ . According to (EC.13), we have

$$\begin{aligned} \nabla f(x^*)^\top (x - x^*) &= (\nabla f(x^*) - \hat{\alpha}_p)^\top (x - x^*) + \hat{\alpha}_p^\top (x - x^*) \\ &= ([\nabla f(x^*)]_S - B(B^\top B)^{-1} B^\top [\nabla f_p(x^*)]_S)^\top (x_S - x_S^*) + \hat{\alpha}_p^\top (x - x^*) \\ &= [\nabla f_p(x^*)]_S^\top (I - B(B^\top B)^{-1} B^\top) B\theta + \hat{\alpha}_p^\top (x - x^*) \\ &= \hat{\alpha}_p^\top (x - x^*) > 0. \end{aligned}$$

Thus, (EC.19) holds, completing the proof of **Claim EC.1**.  $\square$

## EC.8. Proof of Theorem 4

In (4), the 0-th moment constraint that  $\sum_{j=1}^n x_j = 1$ , together with constraint (4d), guarantees the feasible region without constraint (4c) is compact. Further, constraint (4c) can be rewritten as

$$\frac{x_j}{\sum_{k=j} x_k} - \frac{x_{j+1}}{\sum_{k=j+1} x_k} \leq 0 \text{ for } j \in [1, n-1],$$

where the LHS is continuous w.r.t.  $x$ . This gives us that the set where (4c) holds is closed, thus the feasible region is compact. By Theorem 1, problem (4) has an extreme point solution  $x^*$ . This extreme point solution corresponds to an extreme point solution  $y^*$  to problem (5) by equivalence.

Note that by constraint (4c),  $x^*$  must have consecutive support. Otherwise, assume there exist  $1 \leq j_1 < j_2 < j_3 \leq n$  such that  $x_{j_1}^* > 0, x_{j_3}^* > 0, x_{j_2}^* = 0$ ; however,

$$\frac{x_{j_1}^*}{\sum_{k=j_1}^n x_k^*} > \frac{x_{j_2}^*}{\sum_{k=j_2}^n x_k^*} = 0,$$

indicating  $x^*$  is not feasible. Without loss of generality, we can assume the support of  $x^*$  is  $[1, n]$ ; that is, constraints (4d) are strict.

Let  $\underline{x} := \min\{x_j^* : j \in [1, n]\}$  and define the following problem:

$$\max_{y \in \mathbb{R}^n} \sum_{j=1}^{n-1} f_j(y_j - y_{j+1}) + f_n y_n \quad (\text{EC.21a})$$

$$\text{s.t. } \sum_{j=1}^n (w_j^i - w_{j-1}^i) y_j = q_i \quad \text{for } i \in [0, m] \quad (\text{EC.21b})$$

$$y_{j-1} y_{j+1} \leq y_j^2 \quad \text{for } j \in (1, n) \quad (\text{EC.21c})$$

$$y_j - y_{j+1} \geq \underline{x}/2 \quad \text{for } j \in [1, n] \quad (\text{EC.21d})$$

$$y_j \geq 0 \quad \text{for } j \in [1, n]. \quad (\text{EC.21e})$$

The problem above is a restriction of (5) with given support, and plus (redundant) non-negativity constraint (EC.21e) so that it fits our reverse convex programming frameworks. Since  $y^*$  is an extreme point solution to (5), it is also an extreme point solution to (EC.21). Thus, we only need to verify the conditions of [Theorem 2](#).

Again, the 0-th order moment constraint guarantees the feasible region is compact. As argued in [Section 2.2](#), the constraint (EC.21c) is reverse convex relative to the nonnegative orthant, and so is the linear constraint (EC.21d), which implies all of the conditions in [Theorem 2](#) are satisfied when applied to (EC.21).

At the extreme point solution  $y^*$ , the constraints (EC.21d) and (EC.21e) cannot be tight since  $x_j^* = y_j^* - y_{j+1}^* > \underline{x}/2$  and  $y_j^*$  are all positive since the  $x_j^*$  are positive. Applying [Theorem 2](#), we have that at least  $n - m - 1$  of the (EC.21c) constraints are tight at  $y^*$ , or, equivalently, there are at most  $m - 1$  of the (EC.21c) constraints that are not tight at  $y^*$ . These non-tight indexes can divide the interval  $[1, n]$  into at most  $m$  pieces, and within each piece, we have

$$y_{j-1} y_{j+1} = y_j^2, \quad \text{for } j \in (u_i, v_i),$$

where  $u_i$  and  $v_i$  are the left and right endpoints of piece  $i$  of the domain. Thus, letting  $\alpha_i = y_{u_i}$  and  $r_i = y_{u_{i+1}}/y_{u_i}$  yields the solution (13).  $\square$

### EC.9. Proof of Theorem 5

In (6), the zeroth moment constraint that  $\sum_{j=1}^n x_j = 1$  together with constraint (6d) guarantees the feasible region without constraint (6c) is compact. Further, constraint (6c) can be rewritten as

$$j \frac{x_j}{\sum_{k=j}^n x_k} - (j+1) \frac{x_{j+1}}{\sum_{k=j+1}^n x_k} \leq 0 \text{ for } j \in [1, n-1],$$

where the LHS is continuous w.r.t.  $x$ . This gives us that the set where (6c) holds is closed, thus the feasible region is compact. By Theorem 1, problem (6) has an extreme point solution  $x^*$ . This extreme point solution corresponds to an extreme point solution  $y^*$  to problem (7) by equivalence.

Note that by constraint (6c),  $x^*$  must have consecutive support. Otherwise assume there exist  $1 \leq j_1 < j_2 < j_3 \leq n$  such that  $x_{j_1}^* > 0, x_{j_3}^* > 0, x_{j_2}^* = 0$ , however

$$j_1 \frac{x_{j_1}^*}{\sum_{k=j_1}^n x_k^*} > j_2 \frac{x_{j_2}^*}{\sum_{k=j_2}^n x_k^*} = 0,$$

indicating  $x^*$  is not feasible. Without loss of generality, we can assume the support of  $x^*$  is  $[1, n]$ , i.e. constraints (6d) are strict (otherwise we can redefine on the support  $[k, \ell]$  and use analogous arguments).

Let  $\underline{x} := \min\{x_j^* : j \in [1, n]\}$  and define the following problem:

$$\max_{y \in \mathbb{R}^n} \sum_{j=1}^{n-1} f_j(y_j - y_{j+1}) + f_n y_n \quad (\text{EC.22a})$$

$$\text{s.t. } \sum_{j=1}^n (w_j^i - w_{j-1}^i) y_j = q_i \text{ for } i \in [0, m] \quad (\text{EC.22b})$$

$$\left\| \left( \frac{j\sqrt{j-1}y_{j+1}}{\sqrt{j-1}y_j + \frac{y_{j-1}}{2\sqrt{j-1}}} \right) \right\| \geq j\sqrt{j-1}y_{j+1} + \frac{y_{j-1}}{2\sqrt{j-1}} \text{ for } j \in (1, n) \quad (\text{EC.22c})$$

$$y_j - y_{j+1} \geq \underline{x}/2 \text{ for } j \in [1, n] \quad (\text{EC.22d})$$

$$y_j \geq 0 \text{ for } j \in [1, n]. \quad (\text{EC.22e})$$

Note that the problem above is a restriction of (7) with given support, and plus (redundant) negativity constraint (EC.22e) so that it fits our reverse convex programming frameworks.

Since  $y^*$  is an extreme point solution to (7), it is also an extreme point solution to (EC.22). Thus, we only need to verify the conditions of **Theorem 2**.

Again, the zeroth order moment constraint guarantees the feasible region is compact. As argued in **Section 2.3**, the constraint (EC.22c) is reverse convex relative to the nonnegative orthant, and so is the linear constraint (EC.22d). This implies that all of the conditions in **Theorem 2** are satisfied when applied to (EC.22).

At the extreme point solution  $y^*$ , the constraints (EC.22d) and (EC.22e) cannot be tight since  $x_j^* = y_j^* - y_{j+1}^* > \underline{x}/2$  and  $y_j^*$  are all positive since the  $x_j^*$  are positive. Applying **Theorem 2**, we have that at least  $n - m - 1$  of the (EC.22c) constraints are tight at  $y^*$ , or equivalently there are at most  $m - 1$  of the (EC.22c) constraints that are not tight at  $y^*$ . These non-tight indexes can divide the interval  $[1, n]$  into at most  $m$  pieces, and within each piece, we have

$$\left\| \left( \begin{array}{c} j\sqrt{j-1}y_{j+1} \\ \sqrt{j-1}y_j + \frac{y_{j-1}}{2\sqrt{j-1}} \end{array} \right) \right\| = j\sqrt{j-1}y_{j+1} + \frac{y_{j-1}}{2\sqrt{j-1}}, \text{ for } j \in (u_i, v_i)$$

where  $u_i$  and  $v_i$  are the left and right endpoints of piece  $i$  of the domain. Note the equalities above are equivalent to

$$(j-1)\frac{y_{j-1} - y_j}{y_{j-1}} = j\frac{y_j - y_{j+1}}{y_j}, \text{ for } j \in (u_i, v_i).$$

Letting

$$r_i := j\frac{y_j - y_{j+1}}{y_j}, \text{ for } j \in (u_i, v_i),$$

we have

$$y_j = y_{j-1}\left(1 - \frac{r_i}{j-1}\right), \text{ for } j \in (u_i, v_i].$$

using the fact that  $j\frac{y_j - y_{j+1}}{y_j} = r$  is equivalent condition  $y_{j+1} = y_j\left(1 - \frac{r}{j}\right)$ . Thus, letting  $\alpha_i = y_{u_i}$  yields the solution (14).  $\square$

## EC.10. Proof of Lemma 6

If the  $a_j$  are all nonnegative or nonpositive, then  $\phi(z)$  is monotone and has at most one root. Otherwise, there is an  $m$  such that  $a_j \leq 0$  when  $j \leq m$  and  $a_j \geq 0$  when  $j > m$ . Denote  $\phi_1(z) := -\sum_{j=1}^m a_j z^{i_j}$  and  $\phi_2(z) = \sum_{j=m+1}^M a_j z^{i_j}$ . Obviously,  $\phi(z) = \phi_2(z) - \phi_1(z)$ . Suppose  $z_0 > 0$  is a root of  $\phi(z)$ , from non-negativity of  $\phi_1$  and  $\phi_2$  we have  $\phi_2(z_0) = \phi_1(z_0) \neq 0$ . Given any  $z_1 > z_0$ , due to (23) we have that

$$\begin{aligned}\phi_2(z_1) &= \sum_{j=m+1}^M a_j \left(\frac{z_1}{z_0}\right)^{i_j} (z_0)^{i_j} \geq \left(\frac{z_1}{z_0}\right)^{i_{m+1}} \phi_2(z_0) \\ \phi_1(z_1) &= \sum_{j=1}^m -a_j \left(\frac{z_1}{z_0}\right)^{i_j} (z_0)^{i_j} \leq \left(\frac{z_1}{z_0}\right)^{i_m} \phi_1(z_0).\end{aligned}$$

Combining these two inequalities yields

$$\phi(z_1) \geq \left(\frac{z_1}{z_0}\right)^{i_{m+1}} \phi_2(z_0) - \left(\frac{z_1}{z_0}\right)^{i_m} \phi_1(z_0) > \left(\frac{z_1}{z_0}\right)^{i_m} (\phi_2(z_0) - \phi_1(z_0)) = 0. \quad (\text{EC.23})$$

Similarly, for any  $z_2 < z_0$ , it holds that  $\phi(z_2) < \left(\frac{z_2}{z_0}\right)^{i_m} (\phi_2(z_0) - \phi_1(z_0)) = 0$ .

Consequently,  $z_0$  is the only root. Moreover, when  $z_0$  is not a root and satisfies  $\phi(z_0) \geq 0$ , then according to (EC.23)  $\phi(z_1) > \left(\frac{z_1}{z_0}\right)^{i_m} (\phi_2(z_0) - \phi_1(z_0)) > \phi_2(z_0) - \phi_1(z_0) = \phi(z_0)$  implying that  $\phi(z)$  is monotonically increasing on  $\{z \mid \phi(z) \geq 0\}$ .  $\square$

## EC.11. Proof of Lemma 7

It suffices to provide a uniform bound on  $|\frac{\partial g_2(\alpha, \beta)}{\partial \beta}| / |\frac{\partial g_1(\alpha, \beta)}{\partial \beta}|$ . When  $a \leq 0$ , since the distribution has positive mass on both sides of  $a$ , it has positive mass at  $X < a$ . This combined with (24) implies that  $\mathbb{E}[X \cdot (a - X) \mathbf{1}_{X < a}] \leq \mathbb{E}[-(X - a)^2 \mathbf{1}_{X < a}] < 0$ . By further invoking (26) and (22), we have that

$$\begin{aligned}\frac{|\frac{\partial g_2(\alpha, \beta)}{\partial \beta}|}{|\frac{\partial g_1(\alpha, \beta)}{\partial \beta}|} &= \frac{|\mathbb{E}[(1 - X^2)(a - X) \mathbf{1}_{X < a}]|}{|\mathbb{E}[X \cdot (a - X) \mathbf{1}_{X < a}]|} \leq \frac{|\mathbb{E}[(1 - X^2)(a - X) \mathbf{1}_{X < a}]|}{\mathbb{E}[(X - a)^2 \mathbf{1}_{X < a}]} \\ &\leq \max_{x: x=a-j\epsilon, j=1, 2, \dots, \bar{k}} \frac{|(1 - x^2)(a - x)|}{(x - a)^2} \\ &\leq \frac{\max_{x: x=a-j\epsilon, j=1, 2, \dots, \bar{k}} |(1 - x^2)|}{\min_{x: x=a-j\epsilon, j=1, 2, \dots, \bar{k}} (a - x)} \\ &\leq \frac{1 + D^2}{\epsilon},\end{aligned}$$

where the second inequality is due to the fractional linear function  $\frac{y}{z}$  is quasi-convex and thus  $\frac{\sum_i \alpha_i y_i}{\sum_i \alpha_i z_i} \leq \max_i \left\{ \frac{y_i}{z_i} \right\}$  for  $\sum_i \alpha_i = 1$  and  $\alpha_i \geq 0$ .

Similarly, when  $a > 0$  and  $\mathbb{E}X = 0$  implies that  $\mathbb{E}[X \cdot \mathbf{1}_{X < a}] + \mathbb{E}[X \cdot \mathbf{1}_{X \geq a}] = 0$ . Therefore,

$$a \mathbb{E}[X \cdot \mathbf{1}_{X < a}] = -a \mathbb{E}[X \cdot \mathbf{1}_{X \geq a}] \leq -a^2 P(X \geq a),$$

and due to (24)

$$\mathbb{E}[X \cdot (a - X) \mathbf{1}_{X < a}] \leq \mathbb{E}[-X^2 \mathbf{1}_{X < a}] - a^2 P(X \geq a) \leq \mathbb{E}[\min(X, a)^2] < 0,$$

where the last inequality follows from the fact that  $X$  has positive mass at both  $a$  and  $X < a$ . Since the domain of  $X$  is bounded with diameter  $D$ , we also have that for any  $b > 0$

$$\begin{aligned} 1 = \mathbb{E}X^2 &= \mathbb{E}[X^2 \mathbf{1}_{|X| < b}] + \mathbb{E}[X^2 \mathbf{1}_{|X| \geq b}] \leq b^2 \mathbb{E}[\mathbf{1}_{|X| < b}] + D^2 \mathbb{E}[\mathbf{1}_{|X| \geq b}] \\ &= b^2(1 - P(|X| \geq b)) + D^2 P(|X| \geq b). \end{aligned}$$

That is  $P(|X| \geq b) \geq \frac{1-b^2}{D^2-b^2}$ . Furthermore, note that for any  $|X| \geq b$  we have  $|\min(X, a)| \geq \min(b, a)$ . Then,

$$\begin{aligned} \mathbb{E}[\min(X, a)^2] &= \mathbb{E}[\min(X, a)^2 \cdot \mathbf{1}_{|X| \geq b}] + \mathbb{E}[\min(X, a)^2 \cdot \mathbf{1}_{|X| < b}] \\ &\geq \mathbb{E}[\min(X, a)^2 \cdot \mathbf{1}_{|X| \geq b}] \\ &\geq \min(b, a)^2 P(|X| \geq b) \\ &\geq \min(b, a)^2 \frac{1-b^2}{D^2-b^2}. \end{aligned}$$

Since  $\mathbb{E}[X] = 0$  and  $\mathbb{E}[X^2] = 1$ , the upper bound  $D$  of  $|X|$  is greater than 1. Therefore, when  $a > 0$  by taking  $b = 0.5$ , we have  $D^2 - b^2 > 0$  and when  $a > 0$  it holds that

$$\frac{|\frac{\partial g_2(\alpha, \beta)}{\partial \beta}|}{|\frac{\partial g_1(\alpha, \beta)}{\partial \beta}|} = \frac{|\mathbb{E}[(1 - X^2)(a - X) \mathbf{1}_{X < a}]|}{|\mathbb{E}[X \cdot (a - X) \mathbf{1}_{X < a}]|} \leq \frac{|\mathbb{E}[(1 - X^2)(a - X) \mathbf{1}_{X < a}]|}{\mathbb{E}[\min(X, a)^2]} \leq \frac{(1 + D^2)(a + D)}{\min(0.5, a)^2 \frac{0.75}{D^2 - 0.25}}.$$

Combining the bound on  $a \leq 0$ , we conclude that

$$\left| \frac{\frac{\partial g_2(\alpha, \beta)}{\partial \beta}}{\frac{\partial g_1(\alpha, \beta)}{\partial \beta}} \right| \leq \begin{cases} \frac{(1+D^2)(a+D)(D^2-0.25)}{(0.75)\min(0.5,a)^2}, & a > 0 \\ \frac{1+D^2}{\epsilon}, & a \leq 0 \end{cases}.$$

That is, the absolute value of  $|\frac{\partial}{\partial \beta} g_1(\alpha, \beta)|$  is uniformly bounded below.  $\square$

## EC.12. Proof of Theorem 7

Since  $\phi'$  is a continuous function, there exists  $\delta > 0$  such that  $|\phi'(z) - \phi'(\gamma)| \leq \frac{1}{4}|\phi'(\gamma)|$  whenever  $|z - \gamma| \leq \delta$ . Consider a Newton step with  $|z_k - \gamma| \leq \delta$  and

$$\begin{aligned} z_{k+1} - \gamma &= z_k - \gamma - \frac{\phi(z_k) - \phi(\gamma)}{\phi'(z_k)} = \frac{\phi(\gamma) - \phi(z_k) - \phi'(z_k)(\gamma - z_k)}{\phi'(z_k)} \\ &= \frac{(\phi'(\gamma_k) - \phi'(z_k))(\gamma - z_k)}{\phi'(z_k)}, \end{aligned}$$

where  $\gamma_k$  is a point between  $\gamma$  and  $z_k$ . Note that  $|\phi'(\gamma_k) - \phi'(z_k)| = |\phi'(\gamma_k) - \phi'(\gamma) + \phi'(\gamma) - \phi'(z_k)| \leq \frac{1}{2}|\phi'(\gamma)|$  and  $|\phi'(z_k)| \geq \frac{3}{4}|\phi'(\gamma)|$ . Therefore,

$$|z_{k+1} - \gamma| \leq \frac{|\phi'(\gamma_k) - \phi'(z_k)| \cdot |\gamma - z_k|}{|\phi'(z_k)|} \leq \frac{2}{3}|z_k - \gamma| \leq \delta.$$

Moreover, we have

$$\lim_{k \rightarrow \infty} \frac{|z_{k+1} - \gamma|}{|z_k - \gamma|} = \lim_{k \rightarrow \infty} \frac{|\phi'(\gamma_k) - \phi'(z_k)|}{|\phi'(z_k)|} = 0,$$

and we conclude that  $\{z_k\}$  is superlinear convergent.  $\square$

## EC.13. Proof of Theorem 8

According to (25) and (21), we have that  $|\frac{\partial g_2(\alpha, \beta)}{\partial \alpha}| \leq \frac{(1+D^2)(a+D)}{\rho \epsilon}$  and  $|\frac{\partial g_1(\alpha, \beta)}{\partial \alpha}| \leq \frac{(a+D)D}{\rho \epsilon}$  respectively. Finally, by invoking (27) we obtain an upper bound of gradient of  $g_2(\cdot, h(\cdot))$ :

$$\begin{aligned} \left| \frac{dg_2(\alpha, h(\alpha))}{d\alpha} \right| &= \left| \frac{\partial g_2(\alpha, \beta)}{\partial \alpha} + \frac{\partial g_2(\alpha, \beta)}{\partial \beta} \cdot \frac{-\frac{\partial g_1(\alpha, \beta)}{\partial \alpha}}{\frac{\partial g_1(\alpha, \beta)}{\partial \beta}} \right| \\ &\leq \left| \frac{\partial g_2(\alpha, \beta)}{\partial \alpha} \right| + \left| \frac{\partial g_2(\alpha, \beta)}{\partial \beta} \right| \cdot \left| \frac{-\frac{\partial g_1(\alpha, \beta)}{\partial \alpha}}{\frac{\partial g_1(\alpha, \beta)}{\partial \beta}} \right| \\ &\leq \begin{cases} \frac{(1+D^2)(a+D)}{\rho \epsilon} \left( 1 + \frac{D(a+D)(D^2-0.25)}{(0.75)\min(0.5, a)^2} \right), & a > 0 \\ \frac{(1+D^2)(a+D)}{\rho \epsilon} \left( 1 + \frac{D}{\epsilon} \right), & a \leq 0 \end{cases}. \end{aligned}$$

$\square$
